# Supplementary material
Source: publisher figshare collection journal article supplement (https://acs.figshare.com/ndownloader/files/7597522)
Supplement: Supplementary file 1 [file 7597522]

#==============================================================================
data_global
#==============================================================================

_publ_contact_author               'Paul D. Beer'
_publ_contact_author_email          paul.beer@chem.ox.ac.uk

loop_
_publ_author_name
_publ_author_address
 'Lim, Jason Y. C.'
;    
Chemistry Research Laboratory,
University of Oxford,
Mansfield Road, 
Oxford OX1 3TA. UK.
;
 'Marques, Igor'
;    
Department of Chemistry, 
CICECO - Aveiro Institute of Materials, 
University of Aveiro, 
3810-193 Aveiro, Portugal.
and
Department of Medical Sciences, 
iBiMED - Institute of Biomedicine, 
University of Aveiro, 
3810-193 Aveiro, Portugal.
;
 'Thompson, Amber L.'
;    
Chemical Crystallography Department,
Chemistry Research Laboratory,
University of Oxford,
Mansfield Road, 
Oxford OX1 3TA. UK.
;
 'Christensen, Kirsten E.'
;    
Chemical Crystallography Department,
Chemistry Research Laboratory,
University of Oxford,
Mansfield Road, 
Oxford OX1 3TA. UK.
;
 'F\'elix, V\'itor'
;    
Department of Chemistry, 
CICECO - Aveiro Institute of Materials, 
University of Aveiro, 
3810-193 Aveiro, Portugal.
and
Department of Medical Sciences, 
iBiMED - Institute of Biomedicine, 
University of Aveiro, 
3810-193 Aveiro, Portugal.
;
 'Beer, Paul D.'
;    
Chemistry Research Laboratory,
University of Oxford,
Mansfield Road, 
Oxford OX1 3TA. UK.
;
_publ_requested_journal                 
 'Journal of the American Chemical Society'
_journal_volume                    '?'
_journal_page_first                '?'
_journal_page_last                 '?'
_journal_year                      '2016'
_ccdc_journal_depnumber            '?'

_publ_section_title
;
Chalcogen Bonding Macrocycles and [2]Rotaxanes for Anion Recognition
;

_publ_section_abstract
;  
Electron-deficient heavy chalcogen atoms contain Lewis acidic \s-holes which 
are able to form attractive supramolecular interactions, known as chalcogen 
bonding (ChB), with Lewis bases. However, their potential in solution-phase 
anion binding applications is only just beginning to be realized in simple 
acyclic systems. Herein, we explore the 5-(methylchalcogeno)-1,2,3-triazole 
(chalcogen = Se, Te) motif as a novel ChB donor for anion binding. Other 
than being chemically-robust enough to be incorporated into macrocyclic 
structures, thereby significantly expanding the scope and complexity of 
ChB host systems, we also demonstrate, by ^1^H NMR and DFT calculations, 
that the chalcogen atoms oriented within the macrocycle cavity are able 
to chelate copper(I) endotopically. Exploiting this property, the first 
examples of mechanically-interlocked [2]rotaxanes containing ChB-donor 
groups are prepared via an active metal template strategy. Solution-phase 
^1^H NMR and molecular modelling studies provide compelling evidence for 
the dominant influence of ChB in anion binding by these interlocked host 
systems. In addition, unprecedented charge assisted ChB-mediated anion 
binding was also studied in aqueous solvent mixtures which revealed 
considerable differences in anion recognition behavior in comparison with 
all-hydrogen bonding host analogues. Moreover, DFT calculations and 
Molecular Dynamics simulations in aqueous solvent mixtures indicate 
that the selectivity is determined by the different hydrophilic character 
of the anions allied to the hydration of the binding units in the presence 
of the anions. Exploiting the NMR-active nuclei of the ChB-donor chalcogen 
atoms, heteronuclear ^77^Se and %125%Te NMR was used to directly study 
how anion recognition influences the local electronic environment of the 
chalcogen atoms in the mechanically bonded rotaxane binding sites in 
organic and aqueous solvent mixtures.
;


#==============================================================================
data_10-Se-I  
#==============================================================================
_audit_creation_date        "2016-12-05"
_audit_creation_method CRYSTALS_ver_14.61_build_6019 

_oxford_structure_analysis_title  '029jl16 (6693)'
_chemical_name_systematic         .
_chemical_melting_point           'not measured'

_refine_special_details
;
The crystals were both small and weakly diffracting, presumably caused 
by the disorder in the macrocycle and generally poor ordering in the 
structure due at least in part to the chaotropic nature of the iodide
counter-ion.  Despite several attempts to collect data, these were the 
best possible as longer exposures caused radiation damage.

Although the structure solved readily, it was clear on initial refinement
that there was significant disorder, in particular in the hydroquinone 
and polyether parts of the macrocycle.  A two-component model was used
with same-distance restraints to maintain a sensible geometry throughout.
On further refinement it became apparent that the displacement ellipsoid
for one of the seleno-methyl groups became unfeasibly small.  This 
corresponded with enlarged ellipsoids for one of the iodide counter ions.
Even when this was modelled as disordered, the displacement ellipsoids 
were unexpectedly large.  On close inspection of the difference map,
it became apparent that there was a significant peak of residual electron 
density close to the methyl group which was thought to be a small amount 
of residual iodide.  Refining this competitively indicated that this 
was approximately 7% iodide.  The presence of this minor component 
indicated there had to be 7% methyl in the alternate configuration.  The
close proximity of this to the remaining 93% iodide made it difficult
to locate, though a suitable peak was identified and the structure was
refined with restraints and constraints.

The presence of the disorder in the methyl/iodide brought the second 
iodide and the minor component of the disorder within the sum of the van 
der Waal's radii.  The second anion also exhibited an enlarged displacement 
ellipsoid; on refinement this left approximately 7% unaccounted for.
Examination of the difference map suggested this was approximately
0.9 \%A from the main component.
;

_cell_length_a                    22.6944(7)
_cell_length_b                    21.4972(5)
_cell_length_c                    9.4414(3)
_cell_angle_alpha                 90
_cell_angle_beta                  99.847(3)
_cell_angle_gamma                 90
_cell_volume                      4538.3(2)
 
_symmetry_cell_setting            'monoclinic' 
_symmetry_space_group_name_H-M    'P 21/c ' 
_symmetry_space_group_name_Hall   '-P 2ybc' 
loop_
 _symmetry_equiv_pos_as_xyz
 'x,y,z'
 '-x,-y,-z'
 'x,-y+1/2,z+1/2'
 '-x,y+1/2,-z+1/2'

loop_
_atom_type_symbol
_atom_type_scat_dispersion_real
_atom_type_scat_dispersion_imag
_atom_type_scat_Cromer_Mann_a1
_atom_type_scat_Cromer_Mann_b1
_atom_type_scat_Cromer_Mann_a2
_atom_type_scat_Cromer_Mann_b2
_atom_type_scat_Cromer_Mann_a3
_atom_type_scat_Cromer_Mann_b3
_atom_type_scat_Cromer_Mann_a4
_atom_type_scat_Cromer_Mann_b4
_atom_type_scat_Cromer_Mann_c
_atom_type_scat_source  
 C       0.0020   0.0020   2.3100  20.8439   1.0200  10.2075   1.5886   0.5687
   0.8650  51.6512   0.2156 'International Tables Vol C 4.2.6.8 and 6.1.1.4'
 H       0.0000   0.0000   0.4930  10.5109   0.3229  26.1257   0.1402   3.1424
   0.0408  57.7998   0.0030 'International Tables Vol C 4.2.6.8 and 6.1.1.4'
 I      -0.7740   1.7190  20.1472   4.3470  18.9949   0.3814   7.5138  27.7660
   2.2735  66.8776   4.0712 'International Tables Vol C 4.2.6.8 and 6.1.1.4'
 Se     -0.1110   2.1190  17.0006   2.4098   5.8196   0.2726   3.9731  15.2372
   4.3543  43.8163   2.8409 'International Tables Vol C 4.2.6.8 and 6.1.1.4'
 N       0.0040   0.0030  12.2126   0.0057   3.1322   9.8933   2.0125  28.9975
   1.1663   0.5826 -11.5290 'International Tables Vol C 4.2.6.8 and 6.1.1.4'
 O       0.0070   0.0060   3.0485  13.2771   2.2868   5.7011   1.5463   0.3239
   0.8670  32.9089   0.2508 'International Tables Vol C 4.2.6.8 and 6.1.1.4'
 
 
_cell_formula_units_Z                    4

# Given Formula = C45 H50 I2 N6 O5 Se2 
# Dc =      1.71 Fooo =   2304.00 Mu =     30.42 M =   1166.66
# Found Formula = C37.86 H46.78 I2 N6.93 O6 Se2 
# Dc =      1.62 FOOO =   2177.62 Mu =     30.39 M =   1106.59

_chemical_formula_sum             'C37.86 H46.78 I2 N6.93 O6 Se2'
_chemical_formula_moiety          'C36 H44 I2 N6 O6 Se2, I2, 0.928(C2 H3 N)'
_chemical_compound_source                .
_chemical_formula_weight           1106.59
 
 
_cell_measurement_reflns_used        16800
_cell_measurement_theta_min              2
_cell_measurement_theta_max             33
_cell_measurement_temperature          100
 
_exptl_crystal_description        'lath' 
_exptl_crystal_colour             'clear_pale_orange' 
_exptl_crystal_size_min           0.005 
_exptl_crystal_size_mid           0.020 
_exptl_crystal_size_max           0.030 
 
_exptl_crystal_density_diffrn     1.619 
_exptl_crystal_density_meas       'not measured' 
_exptl_crystal_density_method     'not measured' 
# Non-dispersive F(000): 
_exptl_crystal_F_000              2177.621 
_exptl_absorpt_coefficient_mu     3.039 
 
# Sheldrick geometric approximatio 0.94 0.98 
_exptl_absorpt_correction_type    multi-scan 
_exptl_absorpt_process_details    'CrysAlisPro, (Agilent, 2011)' 
_exptl_absorpt_correction_T_min   0.62 
_exptl_absorpt_correction_T_max   0.98 
_diffrn_source                    'Synchrotron'
_diffrn_radiation_type            'Synchrotron'
_diffrn_radiation_monochromator   'Synchrotron'
_diffrn_detector                  'Pilatus 2M'
_diffrn_measurement_device
 'Pilatus 2M detector on Crystal Logic diffractometer'
_diffrn_measurement_device_type
 'Photon counting area detector'
_diffrn_radiation_wavelength           0.68890
_diffrn_measurement_method        \w 
 
# If a reference occurs more than once, delete the author 
# and date from subsequent references. 
_computing_data_collection        'Diamond GDA' 
_computing_cell_refinement        'CrysAlisPro, (Agilent, 2011)' 
_computing_data_reduction         'CrysAlisPro, (Agilent, 2011)' 
_computing_structure_solution     'Superflip (Palatinus & Chapuis, 2007)' 
_computing_structure_refinement   'CRYSTALS (Betteridge et al., 2003)' 
_computing_publication_material   'CRYSTALS (Betteridge et al., 2003)' 
_computing_molecular_graphics     'CAMERON (Watkin et al., 1996)' 
 
_diffrn_standards_interval_time   . 
_diffrn_standards_interval_count  . 
_diffrn_standards_number          0 
_diffrn_standards_decay_%         . 
 
_diffrn_ambient_temperature        100
_diffrn_reflns_number             93015 
_reflns_number_total              22611 
_diffrn_reflns_av_R_equivalents   0.114 
# Number of reflections with Friedels Law is 22611 
# Theoretical number of reflections is about 18519 
 
 
_diffrn_reflns_theta_min          1.766 
_diffrn_reflns_theta_max          36.386 
_diffrn_measured_fraction_theta_max 0.931 
 
_diffrn_reflns_theta_full         31.292 
_diffrn_measured_fraction_theta_full 0.995 
 
 
_diffrn_reflns_limit_h_min        -38 
_diffrn_reflns_limit_h_max        38 
_diffrn_reflns_limit_k_min        -36 
_diffrn_reflns_limit_k_max        36 
_diffrn_reflns_limit_l_min        -15 
_diffrn_reflns_limit_l_max        15 
_reflns_limit_h_min               -38 
_reflns_limit_h_max               38 
_reflns_limit_k_min               0 
_reflns_limit_k_max               36 
_reflns_limit_l_min               0 
_reflns_limit_l_max               15 
 
_oxford_diffrn_Wilson_B_factor    2.04 
_oxford_diffrn_Wilson_scale       7.06 
 
_atom_sites_solution_primary      Other  #heavy,direct,difmap,geom,iterative
# _atom_sites_solution_secondary  difmap
_atom_sites_solution_hydrogens    difmap
 
_refine_diff_density_min          -1.34 
_refine_diff_density_max          2.66 
 
 
# The current dictionary definitions do not cover the 
# situation where the reflections used for refinement were 
# selected by a user-defined sigma threshold 
 
 
# The values actually used during refinement 
_oxford_reflns_threshold_expression_ref     I>-3.0\s(I)
_refine_ls_number_reflns          9208 
_refine_ls_number_restraints      1878 
_refine_ls_number_parameters      716 
_oxford_refine_ls_R_factor_ref    0.0978 
_refine_ls_wR_factor_ref          0.1990 
_refine_ls_goodness_of_fit_ref    0.9868 
_refine_ls_shift/su_max           0.0009512 
_refine_ls_shift/su_mean          0.0000263 
 
 
# The values computed with all filters except I/sigma 
_oxford_reflns_number_all         9208 
_refine_ls_R_factor_all           0.0978 
_refine_ls_wR_factor_all          0.1990 
 
# The values computed with a 2 sigma cutoff - a la SHELX 
_reflns_threshold_expression      I>2.0\s(I)
_reflns_number_gt                 6457 
_refine_ls_R_factor_gt            0.0683 
_refine_ls_wR_factor_gt           0.1767 
 
# choose from: rm (reference molecule of known chirality), 
# ad (anomolous dispersion - Flack), rmad (rm and ad), 
# syn (from synthesis), unk (unknown) or . (not applicable). 
_chemical_absolute_configuration  '.' 
 
 
_refine_ls_structure_factor_coef  Fsqd 
_refine_ls_matrix_type            full
_refine_ls_hydrogen_treatment     constr         #undef, noref, refall,
                                                 # refxyz, refU, constr or mixed
_refine_ls_weighting_scheme       calc 
_refine_ls_weighting_details 
;
 Method= Modified Sheldrick 
 w=1/[\s^2^(F^2^) + ( 0.09P)^2^ +23.64P] 
 ,where P=(max(Fo^2^,0) + 2Fc^2^)/3 
;
# Insert your own references if required - in alphabetical order 
_publ_section_references 
; 
Betteridge, P.W., Carruthers, J.R., Cooper, R.I., 
Prout, K. & Watkin, D.J. (2003). J. Appl. Cryst. 36, 1487. 
 
Agilent (2011). CrysAlisPro. 
 
Palatinus, L. & Chapuis, G. (2007). J. Appl. Cryst. 40, 786-790. 
 
Watkin, D.J., Prout, C.K. & Pearce, L.J. (1996). CAMERON, Chemical 
Crystallography Laboratory, Oxford, UK. 
; 

# Uequiv = arithmetic mean of Ui i.e. Ueqiv = (U1+U2+U3)/3

# Replace last . with number of unfound hydrogen atoms attached to an atom.

# ..._refinement_flags_... 
# . no refinement constraints           S special position constraint on site
# G rigid group refinement of site      R riding atom
# D distance or angle restraint on site T thermal displacement constraints
# U Uiso or Uij restraint (rigid bond)  P partial occupancy constraint


loop_
_atom_site_label
_atom_site_type_symbol
_atom_site_fract_x
_atom_site_fract_y
_atom_site_fract_z
_atom_site_U_iso_or_equiv
_atom_site_occupancy
_atom_site_adp_type
_atom_site_refinement_flags_posn
_atom_site_refinement_flags_adp
_atom_site_refinement_flags_occupancy
_atom_site_disorder_assembly
_atom_site_disorder_group
_atom_site_attached_hydrogens
C1 C 1.0060(3) 0.4912(3) 0.7970(8) 0.0506 1.0000 Uani . U . . . . 
C2 C 0.9694(3) 0.4417(3) 0.7488(8) 0.0474 1.0000 Uani . U . . . . 
C3 C 0.9077(3) 0.4505(3) 0.7111(7) 0.0418 1.0000 Uani . U . . . . 
C4 C 0.8835(3) 0.5095(3) 0.7164(7) 0.0391 1.0000 Uani . U . . . . 
C5 C 0.9215(3) 0.5598(3) 0.7616(7) 0.0394 1.0000 Uani . U . . . . 
C6 C 0.9819(3) 0.5506(3) 0.8019(8) 0.0442 1.0000 Uani . U . . . . 
C7 C 0.8692(3) 0.3967(3) 0.6694(6) 0.0420 1.0000 Uani D U . . . . 
C8 C 0.8584(3) 0.3450(2) 0.7491(5) 0.0382 1.0000 Uani D U . . . . 
N9 N 0.8183(2) 0.3105(2) 0.6579(5) 0.0449 1.0000 Uani D U . . . . 
N10 N 0.8040(3) 0.3354(2) 0.5283(6) 0.0554 1.0000 Uani D U . . . . 
N11 N 0.8355(3) 0.3878(2) 0.5381(6) 0.0534 1.0000 Uani D U . . . . 
Se12 Se 0.88665(3) 0.32816(3) 0.94707(7) 0.0419 1.0000 Uani D U . . . . 
C13 C 0.8468(5) 0.4030(3) 1.0187(10) 0.0393 0.9309(12) Uani D U P 2 1 . 
C113 C 0.9278(4) 0.2460(4) 0.9366(19) 0.0393 0.0691(12) Uani D U P 2 2 . 
C14 C 0.8313(5) 0.4292(4) 0.4119(8) 0.0715 1.0000 Uani . U . . . . 
C15 C 0.7908(3) 0.2497(3) 0.6843(8) 0.0496 1.0000 Uani D U . . . . 
C16 C 0.7261(4) 0.2568(4) 0.6944(9) 0.0569 1.0000 Uani . U . . . . 
O17 O 0.7213(2) 0.2948(2) 0.8144(6) 0.0603 1.0000 Uani . U . . . . 
C18 C 0.6577(5) 0.3030(5) 0.8088(13) 0.0554 0.3869 Uani D U . 1 1 . 
C19 C 0.6094(6) 0.2844(4) 0.7085(10) 0.0594 0.3869 Uani D U . 1 1 . 
C20 C 0.5520(5) 0.2998(5) 0.7269(11) 0.0655 0.3869 Uani D U . 1 1 . 
C21 C 0.5430(4) 0.3335(5) 0.8462(13) 0.0639 0.3869 Uani D U . 1 1 . 
C22 C 0.5914(6) 0.3521(4) 0.9464(11) 0.0595 0.3869 Uani D U . 1 1 . 
C23 C 0.6488(5) 0.3366(4) 0.9281(11) 0.0548 0.3869 Uani D U . 1 1 . 
O24 O 0.4853(5) 0.3522(8) 0.8390(14) 0.0807 0.3869 Uani D U . 1 1 . 
C25 C 0.4556(7) 0.3384(8) 0.946(2) 0.0827 0.3869 Uani D U . 1 1 . 
C26 C 0.4080(9) 0.3815(9) 0.970(2) 0.0970 0.3869 Uani D U . 1 1 . 
O27 O 0.3949(7) 0.4263(7) 0.8699(16) 0.0983 0.3869 Uani D U . 1 1 . 
C28 C 0.3672(10) 0.4778(7) 0.9046(18) 0.0944 0.3869 Uani D U . 1 1 . 
C29 C 0.3559(6) 0.5244(9) 0.791(2) 0.0899 0.3869 Uani D U . 1 1 . 
O30 O 0.4054(5) 0.5455(8) 0.7461(17) 0.0809 0.3869 Uani D U . 1 1 . 
C31 C 0.3977(6) 0.5819(10) 0.6289(19) 0.0842 0.3869 Uani D U . 1 1 . 
C32 C 0.4525(7) 0.6049(9) 0.5861(14) 0.0741 0.3869 Uani D U . 1 1 . 
O33 O 0.4878(5) 0.6406(6) 0.6854(12) 0.0633 0.3869 Uani D U . 1 1 . 
C34 C 0.5427(4) 0.6573(4) 0.6588(12) 0.0594 0.3869 Uani D U . 1 1 . 
C35 C 0.5782(5) 0.6919(4) 0.7638(10) 0.0657 0.3869 Uani D U . 1 1 . 
C36 C 0.6355(5) 0.7097(4) 0.7453(11) 0.0622 0.3869 Uani D U . 1 1 . 
C37 C 0.6565(4) 0.6933(5) 0.6214(13) 0.0607 0.3869 Uani D U . 1 1 . 
C38 C 0.6207(5) 0.6592(4) 0.5158(10) 0.0591 0.3869 Uani D U . 1 1 . 
C39 C 0.5637(5) 0.6411(4) 0.5347(11) 0.0507 0.3869 Uani D U . 1 1 . 
O40 O 0.7167(3) 0.7042(3) 0.5778(7) 0.0674 1.0000 Uani . U . . . . 
C41 C 0.7443(3) 0.7542(3) 0.6601(9) 0.0546 1.0000 Uani . U . . . . 
C42 C 0.8070(3) 0.7587(3) 0.6300(8) 0.0473 1.0000 Uani . U . . . . 
N43 N 0.8449(2) 0.7081(2) 0.6989(5) 0.0410 1.0000 Uani D U . . . . 
N44 N 0.8733(2) 0.7171(2) 0.8307(5) 0.0426 1.0000 Uani D U . . . . 
N45 N 0.9033(2) 0.6649(2) 0.8635(6) 0.0403 1.0000 Uani D U . . . . 
C46 C 0.8942(3) 0.6225(2) 0.7554(6) 0.0384 1.0000 Uani D U . . . . 
C47 C 0.8551(3) 0.6509(2) 0.6458(5) 0.0388 1.0000 Uani D U . . . . 
Se48 Se 0.82572(3) 0.62275(3) 0.45634(7) 0.0440 1.0000 Uani D U . . . . 
C49 C 0.9056(3) 0.6080(5) 0.4081(9) 0.0766 1.0000 Uani D U . . . . 
C50 C 0.9399(3) 0.6594(3) 1.0069(7) 0.0485 1.0000 Uani D U . . . . 
C118 C 0.6658(4) 0.3122(4) 0.8490(9) 0.0568 0.6131 Uani D U . 1 2 . 
C119 C 0.6141(5) 0.2814(4) 0.7929(9) 0.0725 0.6131 Uani D U . 1 2 . 
C120 C 0.5602(4) 0.2998(5) 0.8293(10) 0.0941 0.6131 Uani D U . 1 2 . 
C121 C 0.5583(4) 0.3498(5) 0.9208(11) 0.0970 0.6131 Uani D U . 1 2 . 
C122 C 0.6101(5) 0.3801(4) 0.9784(9) 0.0866 0.6131 Uani D U . 1 2 . 
C123 C 0.6641(4) 0.3614(4) 0.9427(9) 0.0701 0.6131 Uani D U . 1 2 . 
O124 O 0.5069(5) 0.3632(6) 0.9713(18) 0.1365 0.6131 Uani D U . 1 2 . 
C125 C 0.4848(6) 0.4204(7) 0.960(2) 0.1705 0.6131 Uani D U . 1 2 . 
C126 C 0.4196(6) 0.4267(12) 0.9212(19) 0.1665 0.6131 Uani D U . 1 2 . 
O127 O 0.4016(5) 0.4482(8) 0.7876(15) 0.1371 0.6131 Uani D U . 1 2 . 
C128 C 0.3475(5) 0.4746(8) 0.7592(18) 0.1180 0.6131 Uani D U . 1 2 . 
C129 C 0.3423(6) 0.5266(8) 0.660(2) 0.1488 0.6131 Uani D U . 1 2 . 
O130 O 0.3862(6) 0.5689(8) 0.6845(17) 0.1497 0.6131 Uani D U . 1 2 . 
C131 C 0.3853(5) 0.6154(8) 0.589(2) 0.1378 0.6131 Uani D U . 1 2 . 
C132 C 0.4418(6) 0.6492(7) 0.596(2) 0.1438 0.6131 Uani D U . 1 2 . 
O133 O 0.4857(5) 0.6192(6) 0.543(2) 0.1448 0.6131 Uani D U . 1 2 . 
C134 C 0.5410(3) 0.6462(5) 0.5602(12) 0.1237 0.6131 Uani D U . 1 2 . 
C135 C 0.5629(4) 0.6950(5) 0.6486(11) 0.1204 0.6131 Uani D U . 1 2 . 
C136 C 0.6218(5) 0.7154(4) 0.6534(10) 0.0887 0.6131 Uani D U . 1 2 . 
C137 C 0.6579(4) 0.6865(4) 0.5706(11) 0.0731 0.6131 Uani D U . 1 2 . 
C138 C 0.6359(5) 0.6378(4) 0.4812(10) 0.1013 0.6131 Uani D U . 1 2 . 
C139 C 0.5773(5) 0.6174(4) 0.4767(11) 0.1199 0.6131 Uani D U . 1 2 . 
I51 I 0.79799(3) 0.56794(3) 1.07083(10) 0.0687 0.9309(12) Uani . . P 2 1 . 
I151 I 0.7792(5) 0.5849(4) 0.9905(14) 0.0687 0.0691(12) Uani . . P 2 2 . 
I52 I 0.95550(8) 0.19916(12) 0.8129(2) 0.0866 0.689(5) Uani . . P 2 3 . 
I152 I 0.93949(16) 0.17512(13) 0.8580(3) 0.0508 0.242(5) Uani . . P 2 4 . 
I252 I 0.8411(5) 0.4237(3) 1.0110(9) 0.0393 0.0691(12) Uani . U P 2 2 . 
C153 C 0.6633(6) 0.5162(8) 0.7679(17) 0.1276 0.928(4) Uani . U P . . . 
C154 C 0.7060(5) 0.4787(6) 0.7087(13) 0.0853 0.928(4) Uani . U P . . . 
N155 N 0.7391(5) 0.4491(6) 0.6684(14) 0.1180 0.928(4) Uani . U P . . . 
H11 H 1.0470 0.4851 0.8255 0.0609 1.0000 Uiso R . . . . . 
H21 H 0.9856 0.4026 0.7410 0.0569 1.0000 Uiso R . . . . . 
H41 H 0.8423 0.5156 0.6891 0.0469 1.0000 Uiso R . . . . . 
H61 H 1.0069 0.5843 0.8324 0.0528 1.0000 Uiso R . . . . . 
H141 H 0.7998 0.4151 0.3378 0.1070 1.0000 Uiso R . . . . . 
H142 H 0.8686 0.4289 0.3771 0.1069 1.0000 Uiso R . . . . . 
H143 H 0.8233 0.4710 0.4397 0.1071 1.0000 Uiso R . . . . . 
H151 H 0.8123 0.2328 0.7734 0.0599 1.0000 Uiso R . . . . . 
H152 H 0.7946 0.2214 0.6066 0.0598 1.0000 Uiso R . . . . . 
H161 H 0.7048 0.2760 0.6081 0.0682 1.0000 Uiso R . . . . . 
H162 H 0.7089 0.2160 0.7073 0.0679 1.0000 Uiso R . . . . . 
H191 H 0.6154 0.2617 0.6288 0.0711 0.3869 Uiso R . . 1 1 . 
H201 H 0.5194 0.2876 0.6590 0.0790 0.3869 Uiso R . . 1 1 . 
H221 H 0.5854 0.3751 1.0259 0.0710 0.3869 Uiso R . . 1 1 . 
H231 H 0.6812 0.3485 0.9963 0.0661 0.3869 Uiso R . . 1 1 . 
H251 H 0.4843 0.3366 1.0354 0.0991 0.3869 Uiso R . . 1 1 . 
H252 H 0.4374 0.2978 0.9257 0.0991 0.3869 Uiso R . . 1 1 . 
H261 H 0.4199 0.4014 1.0625 0.1159 0.3869 Uiso R . . 1 1 . 
H262 H 0.3719 0.3575 0.9703 0.1160 0.3869 Uiso R . . 1 1 . 
H281 H 0.3920 0.4966 0.9870 0.1131 0.3869 Uiso R . . 1 1 . 
H282 H 0.3289 0.4658 0.9293 0.1130 0.3869 Uiso R . . 1 1 . 
H291 H 0.3354 0.5593 0.8253 0.1080 0.3869 Uiso R . . 1 1 . 
H292 H 0.3303 0.5057 0.7095 0.1080 0.3869 Uiso R . . 1 1 . 
H311 H 0.3738 0.6174 0.6477 0.1010 0.3869 Uiso R . . 1 1 . 
H312 H 0.3763 0.5580 0.5492 0.1009 0.3869 Uiso R . . 1 1 . 
H321 H 0.4415 0.6290 0.4986 0.0890 0.3869 Uiso R . . 1 1 . 
H322 H 0.4754 0.5690 0.5668 0.0890 0.3869 Uiso R . . 1 1 . 
H351 H 0.5638 0.7029 0.8464 0.0789 0.3869 Uiso R . . 1 1 . 
H361 H 0.6597 0.7324 0.8159 0.0750 0.3869 Uiso R . . 1 1 . 
H381 H 0.6348 0.6489 0.4320 0.0711 0.3869 Uiso R . . 1 1 . 
H391 H 0.5397 0.6182 0.4634 0.0609 0.3869 Uiso R . . 1 1 . 
H411 H 0.7232 0.7923 0.6304 0.0662 1.0000 Uiso R . . . . . 
H412 H 0.7432 0.7465 0.7606 0.0660 1.0000 Uiso R . . . . . 
H421 H 0.8242 0.7978 0.6673 0.0568 1.0000 Uiso R . . . . . 
H422 H 0.8057 0.7567 0.5278 0.0569 1.0000 Uiso R . . . . . 
H501 H 0.9291 0.6224 1.0542 0.0728 1.0000 Uiso R . . . . . 
H502 H 0.9809 0.6564 0.9970 0.0732 1.0000 Uiso R . . . . . 
H503 H 0.9346 0.6955 1.0638 0.0730 1.0000 Uiso R . . . . . 
H1191 H 0.6154 0.2482 0.7306 0.0871 0.6131 Uiso R . . 1 2 . 
H1201 H 0.5252 0.2787 0.7924 0.1130 0.6131 Uiso R . . 1 2 . 
H1221 H 0.6089 0.4133 1.0411 0.1040 0.6131 Uiso R . . 1 2 . 
H1231 H 0.6996 0.3820 0.9818 0.0840 0.6131 Uiso R . . 1 2 . 
H1251 H 0.4966 0.4401 1.0532 0.2051 0.6131 Uiso R . . 1 2 . 
H1252 H 0.5031 0.4423 0.8870 0.2051 0.6131 Uiso R . . 1 2 . 
H1261 H 0.4057 0.4551 0.9883 0.1998 0.6131 Uiso R . . 1 2 . 
H1262 H 0.4013 0.3862 0.9287 0.2000 0.6131 Uiso R . . 1 2 . 
H1281 H 0.3374 0.4896 0.8490 0.1421 0.6131 Uiso R . . 1 2 . 
H1282 H 0.3190 0.4430 0.7192 0.1420 0.6131 Uiso R . . 1 2 . 
H1291 H 0.3049 0.5477 0.6661 0.1790 0.6131 Uiso R . . 1 2 . 
H1292 H 0.3412 0.5100 0.5646 0.1790 0.6131 Uiso R . . 1 2 . 
H1311 H 0.3551 0.6449 0.6065 0.1660 0.6131 Uiso R . . 1 2 . 
H1312 H 0.3747 0.5979 0.4938 0.1659 0.6131 Uiso R . . 1 2 . 
H1321 H 0.4569 0.6579 0.6964 0.1730 0.6131 Uiso R . . 1 2 . 
H1322 H 0.4333 0.6879 0.5436 0.1731 0.6131 Uiso R . . 1 2 . 
H1351 H 0.5384 0.7143 0.7051 0.1449 0.6131 Uiso R . . 1 2 . 
H1361 H 0.6366 0.7484 0.7127 0.1071 0.6131 Uiso R . . 1 2 . 
H1381 H 0.6605 0.6189 0.4238 0.1220 0.6131 Uiso R . . 1 2 . 
H1391 H 0.5626 0.5845 0.4168 0.1440 0.6131 Uiso R . . 1 2 . 
H131 H 0.8618 0.4078 1.1186 0.0594 0.9309(12) Uiso R . P 2 1 . 
H132 H 0.8569 0.4393 0.9691 0.0590 0.9309(12) Uiso R . P 2 1 . 
H133 H 0.8032 0.3979 1.0039 0.0587 0.9309(12) Uiso R . P 2 1 . 
H1131 H 0.9260 0.2226 1.0226 0.0590 0.0691(12) Uiso R . P 2 2 . 
H1132 H 0.9689 0.2530 0.9280 0.0590 0.0691(12) Uiso R . P 2 2 . 
H1133 H 0.9081 0.2232 0.8542 0.0590 0.0691(12) Uiso R . P 2 2 . 
H491 H 0.9011 0.5881 0.3154 0.1148 1.0000 Uiso R . . . . . 
H492 H 0.9256 0.6470 0.4056 0.1150 1.0000 Uiso R . . . . . 
H493 H 0.9277 0.5812 0.4810 0.1149 1.0000 Uiso R . . . . . 
H1531 H 0.6590 0.5555 0.7189 0.1909 0.928(4) Uiso R . P . . . 
H1532 H 0.6773 0.5227 0.8686 0.1909 0.928(4) Uiso R . P . . . 
H1533 H 0.6255 0.4953 0.7537 0.1909 0.928(4) Uiso R . P . . . 
loop_
_atom_site_aniso_label
_atom_site_aniso_U_11
_atom_site_aniso_U_22
_atom_site_aniso_U_33
_atom_site_aniso_U_23
_atom_site_aniso_U_13
_atom_site_aniso_U_12
C1 0.048(3) 0.039(2) 0.069(4) 0.010(3) 0.023(3) 0.0014(18) 
C2 0.055(2) 0.033(2) 0.060(4) 0.009(3) 0.024(3) 0.005(2) 
C3 0.054(2) 0.0299(19) 0.044(3) 0.007(2) 0.017(2) -0.0001(17) 
C4 0.044(3) 0.0299(19) 0.048(3) 0.006(2) 0.019(2) -0.0019(17) 
C5 0.047(2) 0.0273(19) 0.048(3) 0.005(2) 0.019(2) 0.0002(16) 
C6 0.044(2) 0.035(2) 0.057(4) 0.005(3) 0.019(3) -0.005(2) 
C7 0.057(3) 0.030(2) 0.043(2) -0.0017(18) 0.020(2) 0.002(2) 
C8 0.043(3) 0.026(2) 0.0489(17) 0.0000(16) 0.0153(19) 0.0065(18) 
N9 0.058(3) 0.029(2) 0.050(2) -0.0035(17) 0.016(2) -0.0001(19) 
N10 0.082(4) 0.036(3) 0.048(2) -0.0051(19) 0.009(2) -0.006(2) 
N11 0.089(4) 0.033(2) 0.041(2) -0.0040(18) 0.016(2) -0.005(2) 
Se12 0.0456(4) 0.0291(3) 0.0521(4) 0.0081(3) 0.0116(3) -0.0013(3) 
C13 0.068(2) 0.019(3) 0.0336(18) 0.008(2) 0.0150(16) -0.007(2) 
C113 0.068(2) 0.019(3) 0.0336(18) 0.008(2) 0.0150(16) -0.007(2) 
C14 0.126(5) 0.048(4) 0.040(3) 0.001(2) 0.016(4) -0.010(4) 
C15 0.062(3) 0.031(3) 0.060(4) -0.005(2) 0.020(3) -0.004(2) 
C16 0.059(3) 0.045(4) 0.068(4) -0.006(3) 0.015(3) -0.004(3) 
O17 0.066(2) 0.056(3) 0.062(3) 0.001(2) 0.019(2) 0.013(2) 
C18 0.065(2) 0.063(7) 0.039(5) 0.006(5) 0.012(4) 0.013(6) 
C19 0.068(3) 0.076(7) 0.038(6) 0.002(5) 0.019(4) -0.001(6) 
C20 0.065(3) 0.089(7) 0.045(6) 0.007(5) 0.016(5) 0.001(6) 
C21 0.064(3) 0.073(7) 0.059(6) 0.008(5) 0.024(4) 0.009(5) 
C22 0.076(4) 0.058(7) 0.046(6) 0.009(5) 0.015(4) 0.024(6) 
C23 0.069(3) 0.051(7) 0.043(6) 0.005(5) 0.007(4) 0.019(6) 
O24 0.070(4) 0.093(7) 0.081(6) 0.016(6) 0.020(4) 0.025(5) 
C25 0.049(5) 0.108(7) 0.095(7) -0.010(6) 0.022(5) -0.006(5) 
C26 0.050(5) 0.109(7) 0.139(7) -0.002(6) 0.037(6) -0.005(6) 
O27 0.062(5) 0.103(6) 0.139(7) -0.005(5) 0.042(6) -0.001(5) 
C28 0.076(6) 0.097(6) 0.122(7) -0.009(5) 0.052(6) -0.011(6) 
C29 0.050(5) 0.106(7) 0.118(7) -0.010(6) 0.028(6) 0.001(6) 
O30 0.055(5) 0.093(7) 0.100(6) 0.002(5) 0.028(5) 0.009(5) 
C31 0.044(5) 0.101(8) 0.101(7) 0.007(6) -0.007(5) 0.001(5) 
C32 0.068(5) 0.074(7) 0.075(6) -0.006(6) -0.001(5) -0.016(5) 
O33 0.063(4) 0.057(6) 0.066(6) -0.004(5) -0.002(4) 0.000(4) 
C34 0.063(4) 0.061(7) 0.049(5) -0.009(5) -0.005(4) -0.004(5) 
C35 0.050(4) 0.099(7) 0.042(6) -0.021(5) -0.010(4) 0.007(5) 
C36 0.057(4) 0.084(7) 0.039(5) -0.008(6) -0.010(4) 0.001(5) 
C37 0.057(4) 0.065(7) 0.057(6) -0.018(6) 0.001(4) -0.002(5) 
C38 0.073(4) 0.047(7) 0.055(6) -0.013(5) 0.003(4) -0.005(5) 
C39 0.067(4) 0.032(6) 0.047(5) -0.007(5) -0.007(4) -0.001(5) 
O40 0.064(2) 0.054(3) 0.084(3) -0.011(2) 0.013(2) -0.002(2) 
C41 0.057(3) 0.041(3) 0.065(4) 0.001(3) 0.008(3) 0.009(2) 
C42 0.063(3) 0.026(3) 0.054(3) 0.003(2) 0.014(3) 0.006(2) 
N43 0.051(3) 0.0247(19) 0.050(2) 0.0015(17) 0.0162(19) 0.0018(18) 
N44 0.050(3) 0.029(2) 0.051(2) -0.0006(19) 0.0160(19) 0.0024(19) 
N45 0.044(3) 0.026(2) 0.051(2) 0.0011(17) 0.0117(19) -0.0036(18) 
C46 0.046(3) 0.0242(19) 0.048(2) 0.0042(17) 0.016(2) -0.0038(19) 
C47 0.049(3) 0.026(2) 0.044(2) 0.0020(17) 0.0171(19) 0.001(2) 
Se48 0.0600(4) 0.0303(3) 0.0438(4) 0.0016(3) 0.0149(3) 0.0040(3) 
C49 0.075(3) 0.101(6) 0.060(4) -0.007(4) 0.030(4) 0.024(4) 
C50 0.049(3) 0.045(3) 0.052(3) -0.002(3) 0.010(2) 0.001(3) 
C118 0.058(3) 0.052(5) 0.061(6) 0.008(4) 0.012(4) 0.012(4) 
C119 0.068(3) 0.058(6) 0.093(7) 0.001(5) 0.018(5) -0.001(4) 
C120 0.065(4) 0.088(6) 0.135(7) -0.013(5) 0.033(5) -0.016(5) 
C121 0.074(3) 0.099(6) 0.130(7) -0.013(5) 0.049(5) -0.008(5) 
C122 0.075(4) 0.081(6) 0.111(7) -0.021(5) 0.035(5) 0.009(4) 
C123 0.068(4) 0.061(6) 0.086(6) -0.006(4) 0.026(5) 0.008(4) 
O124 0.099(4) 0.134(6) 0.200(7) -0.019(6) 0.094(5) -0.015(5) 
C125 0.107(4) 0.206(7) 0.202(8) 0.005(8) 0.036(6) 0.073(6) 
C126 0.097(4) 0.209(8) 0.191(7) 0.038(7) 0.017(7) -0.002(6) 
O127 0.085(5) 0.168(7) 0.165(6) 0.002(6) 0.041(5) 0.018(5) 
C128 0.060(4) 0.172(7) 0.128(7) -0.015(6) 0.035(6) -0.006(5) 
C129 0.054(5) 0.200(7) 0.184(8) 0.026(6) -0.006(7) -0.016(5) 
O130 0.093(5) 0.191(7) 0.170(7) -0.008(6) 0.036(6) -0.034(5) 
C131 0.063(4) 0.137(7) 0.214(8) -0.009(6) 0.023(6) 0.013(5) 
C132 0.071(4) 0.129(7) 0.234(8) 0.013(7) 0.033(6) 0.013(5) 
O133 0.078(4) 0.116(7) 0.248(8) -0.027(6) 0.049(5) -0.022(4) 
C134 0.083(4) 0.084(7) 0.213(8) -0.013(6) 0.052(5) -0.021(5) 
C135 0.071(4) 0.094(7) 0.203(8) -0.021(6) 0.045(5) -0.005(5) 
C136 0.075(4) 0.056(6) 0.144(7) 0.000(5) 0.043(5) -0.001(4) 
C137 0.063(3) 0.047(5) 0.110(7) 0.000(4) 0.017(4) 0.002(4) 
C138 0.078(4) 0.081(6) 0.149(7) -0.028(5) 0.029(5) -0.027(5) 
C139 0.075(4) 0.094(7) 0.194(8) -0.029(6) 0.033(5) -0.026(5) 
I51 0.0679(4) 0.0454(3) 0.0976(6) -0.0273(3) 0.0273(4) -0.0102(3) 
I151 0.0679(4) 0.0454(3) 0.0976(6) -0.0273(3) 0.0273(4) -0.0102(3) 
I52 0.0712(8) 0.0830(13) 0.0941(12) -0.0567(10) -0.0188(7) 0.0356(8) 
I152 0.0764(17) 0.0243(11) 0.0580(14) 0.0070(10) 0.0296(12) 0.0048(10) 
I252 0.068(2) 0.019(3) 0.0336(18) 0.008(2) 0.0150(16) -0.007(2) 
C153 0.085(5) 0.148(7) 0.155(7) -0.002(7) 0.036(6) 0.019(5) 
C154 0.064(4) 0.094(6) 0.097(6) 0.015(5) 0.014(4) 0.000(4) 
N155 0.077(5) 0.121(6) 0.158(7) -0.030(6) 0.028(5) -0.006(4) 

_refine_ls_extinction_method 
    'None'
_oxford_refine_ls_scale 0.703(2) 
loop_
 _geom_bond_atom_site_label_1
 _geom_bond_site_symmetry_1
 _geom_bond_atom_site_label_2
 _geom_bond_site_symmetry_2
 _geom_bond_distance
 _geom_bond_publ_flag
C1 . C2 . 1.377(10)    yes
C1 . C6 . 1.393(9)    yes
C1 . H11 . 0.931    no
C2 . C3 . 1.398(10)    yes
C2 . H21 . 0.927    no
C3 . C4 . 1.387(9)    yes
C3 . C7 . 1.461(9)    yes
C4 . C5 . 1.403(9)    yes
C4 . H41 . 0.936    no
C5 . C6 . 1.373(9)    yes
C5 . C46 . 1.481(8)    yes
C6 . H61 . 0.935    no
C7 . C8 . 1.388(6)    yes
C7 . N11 . 1.355(6)    yes
C8 . N9 . 1.360(6)    yes
C8 . Se12 . 1.904(5)    yes
N9 . N10 . 1.324(6)    yes
N9 . C15 . 1.486(8)    yes
N10 . N11 . 1.328(6)    yes
N11 . C14 . 1.478(9)    yes
Se12 . C13 . 2.018(6)    yes
Se12 . C113 . 2.008(9)    yes
C13 . H131 . 0.952    no
C13 . H132 . 0.960    no
C13 . H133 . 0.981    no
C113 . H1131 . 0.962    no
C113 . H1132 . 0.962    no
C113 . H1133 . 0.963    no
C14 . H141 . 0.959    no
C14 . H142 . 0.959    no
C14 . H143 . 0.962    no
C15 . C16 . 1.495(10)    yes
C15 . H151 . 0.968    no
C15 . H152 . 0.968    no
C16 . O17 . 1.417(9)    yes
C16 . H161 . 0.966    no
C16 . H162 . 0.975    no
O17 . C18 . 1.445(11)    yes
O17 . C118 . 1.405(9)    yes
C18 . C19 . 1.380(7)    yes
C18 . C23 . 1.382(7)    yes
C19 . C20 . 1.384(7)    yes
C19 . H191 . 0.928    no
C20 . C21 . 1.384(7)    yes
C20 . H201 . 0.931    no
C21 . C22 . 1.379(7)    yes
C21 . O24 . 1.361(8)    yes
C22 . C23 . 1.385(7)    yes
C22 . H221 . 0.928    no
C23 . H231 . 0.927    no
O24 . C25 . 1.345(8)    yes
C25 . C26 . 1.467(9)    yes
C25 . H251 . 0.972    no
C25 . H252 . 0.970    no
C26 . O27 . 1.344(9)    yes
C26 . H261 . 0.971    no
C26 . H262 . 0.968    no
O27 . C28 . 1.341(9)    yes
C28 . C29 . 1.458(9)    yes
C28 . H281 . 0.968    no
C28 . H282 . 0.971    no
C29 . O30 . 1.345(9)    yes
C29 . H291 . 0.968    no
C29 . H292 . 0.969    no
O30 . C31 . 1.342(9)    yes
C31 . C32 . 1.458(9)    yes
C31 . H311 . 0.971    no
C31 . H312 . 0.970    no
C32 . O33 . 1.362(8)    yes
C32 . H321 . 0.971    no
C32 . H322 . 0.965    no
O33 . C34 . 1.360(8)    yes
C34 . C35 . 1.382(7)    yes
C34 . C39 . 1.383(7)    yes
C35 . C36 . 1.393(7)    yes
C35 . H351 . 0.928    no
C36 . C37 . 1.382(7)    yes
C36 . H361 . 0.928    no
C37 . C38 . 1.384(7)    yes
C37 . O40 . 1.512(11)    yes
C38 . C39 . 1.392(7)    yes
C38 . H381 . 0.930    no
C39 . H391 . 0.930    no
O40 . C41 . 1.409(9)    yes
O40 . C41 . 1.409(9)    yes
O40 . C137 . 1.378(9)    yes
C41 . C42 . 1.501(10)    yes
C41 . H411 . 0.965    no
C41 . H412 . 0.967    no
C42 . N43 . 1.468(8)    yes
C42 . H421 . 0.966    no
C42 . H422 . 0.961    no
N43 . N44 . 1.314(6)    yes
N43 . C47 . 1.363(6)    yes
N44 . N45 . 1.323(6)    yes
N45 . C46 . 1.357(6)    yes
N45 . C50 . 1.467(8)    yes
C46 . C47 . 1.384(6)    yes
C47 . Se48 . 1.898(5)    yes
Se48 . C49 . 1.970(6)    yes
C49 . H491 . 0.963    no
C49 . H492 . 0.955    no
C49 . H493 . 0.968    no
C50 . H501 . 0.964    no
C50 . H502 . 0.952    no
C50 . H503 . 0.964    no
C118 . C119 . 1.372(7)    yes
C118 . C123 . 1.383(7)    yes
C119 . C120 . 1.385(7)    yes
C119 . H1191 . 0.928    no
C120 . C121 . 1.383(7)    yes
C120 . H1201 . 0.928    no
C121 . C122 . 1.373(7)    yes
C121 . O124 . 1.363(8)    yes
C122 . C123 . 1.384(7)    yes
C122 . H1221 . 0.931    no
C123 . H1231 . 0.939    no
O124 . C125 . 1.326(8)    yes
C125 . C126 . 1.470(8)    yes
C125 . H1251 . 0.973    no
C125 . H1252 . 0.981    no
C126 . O127 . 1.339(9)    yes
C126 . H1261 . 0.970    no
C126 . H1262 . 0.973    no
O127 . C128 . 1.337(8)    yes
C128 . C129 . 1.449(9)    yes
C128 . H1281 . 0.971    no
C128 . H1282 . 0.969    no
C129 . O130 . 1.339(9)    yes
C129 . H1291 . 0.971    no
C129 . H1292 . 0.967    no
O130 . C131 . 1.343(9)    yes
C131 . C132 . 1.464(8)    yes
C131 . H1311 . 0.969    no
C131 . H1312 . 0.967    no
C132 . O133 . 1.355(8)    yes
C132 . H1321 . 0.972    no
C132 . H1322 . 0.969    no
O133 . C134 . 1.366(8)    yes
C134 . C135 . 1.379(7)    yes
C134 . C139 . 1.380(7)    yes
C135 . C136 . 1.399(7)    yes
C135 . H1351 . 0.930    no
C136 . C137 . 1.374(7)    yes
C136 . H1361 . 0.931    no
C137 . C138 . 1.384(7)    yes
C138 . C139 . 1.394(7)    yes
C138 . H1381 . 0.935    no
C139 . H1391 . 0.930    no
C153 . C154 . 1.446(17)    yes
C153 . H1531 . 0.959    no
C153 . H1532 . 0.960    no
C153 . H1533 . 0.957    no
C154 . N155 . 1.102(14)    yes
loop_
 _geom_angle_atom_site_label_1
 _geom_angle_site_symmetry_1
 _geom_angle_atom_site_label_2
 _geom_angle_site_symmetry_2
 _geom_angle_atom_site_label_3
 _geom_angle_site_symmetry_3
 _geom_angle
 _geom_angle_publ_flag
C2 . C1 . C6 . 120.0(7)    yes
C2 . C1 . H11 . 120.2    no
C6 . C1 . H11 . 119.8    no
C1 . C2 . C3 . 120.1(6)    yes
C1 . C2 . H21 . 120.1    no
C3 . C2 . H21 . 119.7    no
C2 . C3 . C4 . 120.0(6)    yes
C2 . C3 . C7 . 119.2(6)    yes
C4 . C3 . C7 . 120.8(6)    yes
C3 . C4 . C5 . 119.3(6)    yes
C3 . C4 . H41 . 120.1    no
C5 . C4 . H41 . 120.6    no
C4 . C5 . C6 . 120.4(6)    yes
C4 . C5 . C46 . 117.3(6)    yes
C6 . C5 . C46 . 122.2(6)    yes
C1 . C6 . C5 . 120.2(6)    yes
C1 . C6 . H61 . 120.0    no
C5 . C6 . H61 . 119.8    no
C3 . C7 . C8 . 129.9(5)    yes
C3 . C7 . N11 . 125.2(5)    yes
C8 . C7 . N11 . 104.9(5)    yes
C7 . C8 . N9 . 104.8(5)    yes
C7 . C8 . Se12 . 128.5(4)    yes
N9 . C8 . Se12 . 126.5(4)    yes
C8 . N9 . N10 . 113.3(5)    yes
C8 . N9 . C15 . 128.8(5)    yes
N10 . N9 . C15 . 117.8(5)    yes
N9 . N10 . N11 . 103.6(5)    yes
C7 . N11 . N10 . 113.4(5)    yes
C7 . N11 . C14 . 126.9(6)    yes
N10 . N11 . C14 . 119.7(6)    yes
C8 . Se12 . C13 . 94.7(3)    yes
C8 . Se12 . C113 . 101.6(5)    yes
Se12 . C13 . H131 . 108.4    no
Se12 . C13 . H132 . 109.1    no
H131 . C13 . H132 . 108.6    no
Se12 . C13 . H133 . 111.2    no
H131 . C13 . H133 . 109.6    no
H132 . C13 . H133 . 109.9    no
Se12 . C113 . H1131 . 109.4    no
Se12 . C113 . H1132 . 109.4    no
H1131 . C113 . H1132 . 109.6    no
Se12 . C113 . H1133 . 109.4    no
H1131 . C113 . H1133 . 109.5    no
H1132 . C113 . H1133 . 109.6    no
N11 . C14 . H141 . 109.6    no
N11 . C14 . H142 . 109.5    no
H141 . C14 . H142 . 109.8    no
N11 . C14 . H143 . 109.4    no
H141 . C14 . H143 . 109.9    no
H142 . C14 . H143 . 108.7    no
N9 . C15 . C16 . 111.5(6)    yes
N9 . C15 . H151 . 108.3    no
C16 . C15 . H151 . 109.6    no
N9 . C15 . H152 . 109.3    no
C16 . C15 . H152 . 109.0    no
H151 . C15 . H152 . 109.0    no
C15 . C16 . O17 . 108.7(6)    yes
C15 . C16 . H161 . 110.2    no
O17 . C16 . H161 . 109.3    no
C15 . C16 . H162 . 109.6    no
O17 . C16 . H162 . 109.3    no
H161 . C16 . H162 . 109.7    no
C16 . O17 . C18 . 104.7(7)    yes
C16 . O17 . C118 . 122.4(7)    yes
O17 . C18 . C19 . 131.4(9)    yes
O17 . C18 . C23 . 108.6(9)    yes
C19 . C18 . C23 . 120.01(8)    yes
C18 . C19 . C20 . 120.01(8)    yes
C18 . C19 . H191 . 119.9    no
C20 . C19 . H191 . 120.1    no
C19 . C20 . C21 . 120.00(8)    yes
C19 . C20 . H201 . 120.1    no
C21 . C20 . H201 . 119.9    no
C20 . C21 . C22 . 119.98(8)    yes
C20 . C21 . O24 . 112.8(11)    yes
C22 . C21 . O24 . 126.5(11)    yes
C21 . C22 . C23 . 120.00(8)    yes
C21 . C22 . H221 . 120.1    no
C23 . C22 . H221 . 119.9    no
C22 . C23 . C18 . 120.01(8)    yes
C22 . C23 . H231 . 119.9    no
C18 . C23 . H231 . 120.1    no
C21 . O24 . C25 . 120.0(7)    yes
O24 . C25 . C26 . 116.8(7)    yes
O24 . C25 . H251 . 108.2    no
C26 . C25 . H251 . 107.3    no
O24 . C25 . H252 . 107.3    no
C26 . C25 . H252 . 107.4    no
H251 . C25 . H252 . 109.8    no
C25 . C26 . O27 . 115.3(7)    yes
C25 . C26 . H261 . 108.4    no
O27 . C26 . H261 . 108.1    no
C25 . C26 . H262 . 108.0    no
O27 . C26 . H262 . 107.4    no
H261 . C26 . H262 . 109.5    no
C26 . O27 . C28 . 118.5(8)    yes
O27 . C28 . C29 . 114.7(8)    yes
O27 . C28 . H281 . 107.9    no
C29 . C28 . H281 . 108.0    no
O27 . C28 . H282 . 108.4    no
C29 . C28 . H282 . 107.9    no
H281 . C28 . H282 . 109.8    no
C28 . C29 . O30 . 114.4(8)    yes
C28 . C29 . H291 . 108.8    no
O30 . C29 . H291 . 108.5    no
C28 . C29 . H292 . 107.8    no
O30 . C29 . H292 . 108.0    no
H291 . C29 . H292 . 109.3    no
C29 . O30 . C31 . 117.3(7)    yes
O30 . C31 . C32 . 115.5(8)    yes
O30 . C31 . H311 . 107.7    no
C32 . C31 . H311 . 108.3    no
O30 . C31 . H312 . 108.0    no
C32 . C31 . H312 . 107.6    no
H311 . C31 . H312 . 109.6    no
C31 . C32 . O33 . 115.5(8)    yes
C31 . C32 . H321 . 108.0    no
O33 . C32 . H321 . 108.8    no
C31 . C32 . H322 . 107.1    no
O33 . C32 . H322 . 108.0    no
H321 . C32 . H322 . 109.5    no
C32 . O33 . C34 . 118.1(7)    yes
O33 . C34 . C35 . 116.7(8)    yes
O33 . C34 . C39 . 123.3(8)    yes
C35 . C34 . C39 . 119.99(8)    yes
C34 . C35 . C36 . 120.01(8)    yes
C34 . C35 . H351 . 119.6    no
C36 . C35 . H351 . 120.4    no
C35 . C36 . C37 . 120.00(8)    yes
C35 . C36 . H361 . 120.4    no
C37 . C36 . H361 . 119.6    no
C36 . C37 . C38 . 119.99(8)    yes
C36 . C37 . O40 . 130.5(8)    yes
C38 . C37 . O40 . 109.4(8)    yes
C37 . C38 . C39 . 120.00(8)    yes
C37 . C38 . H381 . 119.7    no
C39 . C38 . H381 . 120.3    no
C38 . C39 . C34 . 120.00(8)    yes
C38 . C39 . H391 . 119.8    no
C34 . C39 . H391 . 120.2    no
C37 . O40 . C41 . 107.8(7)    yes
C41 . O40 . C137 . 125.0(7)    yes
O40 . C41 . C42 . 107.0(6)    yes
O40 . C41 . H411 . 109.5    no
C42 . C41 . H411 . 109.2    no
O40 . C41 . H412 . 109.0    no
C42 . C41 . H412 . 112.4    no
H411 . C41 . H412 . 109.7    no
C41 . C42 . N43 . 111.7(6)    yes
C41 . C42 . H421 . 109.0    no
N43 . C42 . H421 . 108.3    no
C41 . C42 . H422 . 108.6    no
N43 . C42 . H422 . 109.0    no
H421 . C42 . H422 . 110.4    no
C42 . N43 . N44 . 117.7(5)    yes
C42 . N43 . C47 . 129.0(5)    yes
N44 . N43 . C47 . 113.3(5)    yes
N43 . N44 . N45 . 104.2(4)    yes
N44 . N45 . C46 . 112.8(5)    yes
N44 . N45 . C50 . 118.2(5)    yes
C46 . N45 . C50 . 129.0(5)    yes
C5 . C46 . N45 . 124.9(5)    yes
C5 . C46 . C47 . 129.9(5)    yes
N45 . C46 . C47 . 105.2(5)    yes
C46 . C47 . N43 . 104.5(4)    yes
C46 . C47 . Se48 . 129.9(4)    yes
N43 . C47 . Se48 . 125.4(4)    yes
C47 . Se48 . C49 . 94.6(3)    yes
Se48 . C49 . H491 . 108.7    no
Se48 . C49 . H492 . 108.9    no
H491 . C49 . H492 . 110.2    no
Se48 . C49 . H493 . 108.4    no
H491 . C49 . H493 . 110.1    no
H492 . C49 . H493 . 110.5    no
N45 . C50 . H501 . 110.2    no
N45 . C50 . H502 . 108.8    no
H501 . C50 . H502 . 108.8    no
N45 . C50 . H503 . 110.1    no
H501 . C50 . H503 . 109.9    no
H502 . C50 . H503 . 109.0    no
O17 . C118 . C119 . 121.5(7)    yes
O17 . C118 . C123 . 118.5(7)    yes
C119 . C118 . C123 . 120.01(8)    yes
C118 . C119 . C120 . 120.00(8)    yes
C118 . C119 . H1191 . 120.0    no
C120 . C119 . H1191 . 120.0    no
C119 . C120 . C121 . 119.99(8)    yes
C119 . C120 . H1201 . 120.1    no
C121 . C120 . H1201 . 119.9    no
C120 . C121 . C122 . 119.97(8)    yes
C120 . C121 . O124 . 120.2(10)    yes
C122 . C121 . O124 . 119.1(10)    yes
C121 . C122 . C123 . 119.99(8)    yes
C121 . C122 . H1221 . 120.0    no
C123 . C122 . H1221 . 120.0    no
C122 . C123 . C118 . 120.02(8)    yes
C122 . C123 . H1231 . 120.2    no
C118 . C123 . H1231 . 119.7    no
C121 . O124 . C125 . 120.2(8)    yes
O124 . C125 . C126 . 117.2(8)    yes
O124 . C125 . H1251 . 106.7    no
C126 . C125 . H1251 . 107.1    no
O124 . C125 . H1252 . 107.6    no
C126 . C125 . H1252 . 108.1    no
H1251 . C125 . H1252 . 110.0    no
C125 . C126 . O127 . 113.4(8)    yes
C125 . C126 . H1261 . 108.8    no
O127 . C126 . H1261 . 108.5    no
C125 . C126 . H1262 . 108.8    no
O127 . C126 . H1262 . 108.2    no
H1261 . C126 . H1262 . 109.0    no
C126 . O127 . C128 . 117.2(7)    yes
O127 . C128 . C129 . 115.4(8)    yes
O127 . C128 . H1281 . 108.1    no
C129 . C128 . H1281 . 107.6    no
O127 . C128 . H1282 . 108.0    no
C129 . C128 . H1282 . 108.3    no
H1281 . C128 . H1282 . 109.3    no
C128 . C129 . O130 . 115.9(8)    yes
C128 . C129 . H1291 . 107.4    no
O130 . C129 . H1291 . 107.7    no
C128 . C129 . H1292 . 107.6    no
O130 . C129 . H1292 . 108.1    no
H1291 . C129 . H1292 . 110.1    no
C129 . O130 . C131 . 117.7(8)    yes
O130 . C131 . C132 . 115.4(8)    yes
O130 . C131 . H1311 . 107.6    no
C132 . C131 . H1311 . 107.9    no
O130 . C131 . H1312 . 107.9    no
C132 . C131 . H1312 . 108.1    no
H1311 . C131 . H1312 . 109.9    no
C131 . C132 . O133 . 116.3(8)    yes
C131 . C132 . H1321 . 107.2    no
O133 . C132 . H1321 . 107.1    no
C131 . C132 . H1322 . 107.9    no
O133 . C132 . H1322 . 108.4    no
H1321 . C132 . H1322 . 109.8    no
C132 . O133 . C134 . 118.2(7)    yes
O133 . C134 . C135 . 128.7(9)    yes
O133 . C134 . C139 . 111.3(9)    yes
C135 . C134 . C139 . 119.97(8)    yes
C134 . C135 . C136 . 120.00(8)    yes
C134 . C135 . H1351 . 119.8    no
C136 . C135 . H1351 . 120.2    no
C135 . C136 . C137 . 120.01(8)    yes
C135 . C136 . H1361 . 120.1    no
C137 . C136 . H1361 . 119.9    no
O40 . C137 . C136 . 121.0(8)    yes
O40 . C137 . C138 . 119.0(8)    yes
C136 . C137 . C138 . 120.00(8)    yes
C137 . C138 . C139 . 120.02(8)    yes
C137 . C138 . H1381 . 119.5    no
C139 . C138 . H1381 . 120.5    no
C138 . C139 . C134 . 119.99(8)    yes
C138 . C139 . H1391 . 119.9    no
C134 . C139 . H1391 . 120.1    no
C154 . C153 . H1531 . 108.9    no
C154 . C153 . H1532 . 109.4    no
H1531 . C153 . H1532 . 109.9    no
C154 . C153 . H1533 . 109.2    no
H1531 . C153 . H1533 . 109.3    no
H1532 . C153 . H1533 . 110.1    no
C153 . C154 . N155 . 177.4(15)    yes
loop_
 _geom_hbond_atom_site_label_D
 _geom_hbond_site_symmetry_D
 _geom_hbond_atom_site_label_H
 _geom_hbond_site_symmetry_H
 _geom_hbond_atom_site_label_A
 _geom_hbond_site_symmetry_A
 _geom_hbond_angle_DHA
 _geom_hbond_distance_DH
 _geom_hbond_distance_HA
 _geom_hbond_distance_DA
 _geom_hbond_publ_flag
C122 . H221 . O124 . 129 0.78 1.79 2.359(15)    yes
C122 . H221 . C125 . 122 0.78 2.46 2.949(15)    yes
C25 . H252 . C135 4_646 154 0.97 2.32 3.217(15)    yes
C25 . H252 . C136 4_646 167 0.97 2.27 3.224(15)    yes
C129 . H292 . O27 . 123 0.73 2.57 3.032(15)    yes
C129 . H292 . C28 . 129 0.73 1.98 2.510(15)    yes
C129 . H292 . C128 . 129 0.73 0.87 1.449(15)    yes
O133 . H321 . C131 . 122 1.04 1.68 2.395(15)    yes
C35 . H351 . C25 2_667 141 0.93 2.26 3.035(15)    yes
C139 . H391 . C32 . 143 0.84 2.47 3.187(15)    yes
C139 . H391 . O133 . 143 0.84 1.54 2.268(15)    yes
C122 . H1221 . C28 2_667 147 0.93 2.44 3.261(15)    yes
C122 . H1221 . C29 2_667 156 0.93 2.12 2.997(15)    yes
C122 . H1221 . O30 2_667 152 0.93 2.27 3.124(15)    yes
C28 . H1261 . C125 . 130 1.18 2.01 2.906(15)    yes
O27 . H1262 . C25 . 130 1.02 1.59 2.376(15)    yes
C28 . H1281 . C129 . 122 0.82 1.97 2.510(15)    yes
C132 . H1322 . C19 2_666 135 0.97 2.48 3.239(15)    yes
C139 . H1391 . O127 2_666 126 0.93 2.33 2.975(15)    yes
C153 . H1532 . C28 2_667 137 0.96 2.52 3.284(15)    yes


_iucr_refine_instructions_details
;
#
# Punched on 05/12/16 at 15:20:43
#
#LIST     12                                                                    
BLOCK SCALE X'S  U'S 
CONT I(52,OCC) I(152,OCC) I(252,OCC) 
EQUIV PART(2001,OCC) PART(2002,OCC) 
WEIGHT -1  PART(2002,OCC) 
EQUIV RESIDUE(3,OCC) 
RIDE C(13,U'S) C(113,U'S) I(252,U'S) 
RIDE I(51,U'S) I(151,U'S) 
RIDE C   (   1,X'S) H   (  11,X'S) 
RIDE C   (   2,X'S) H   (  21,X'S) 
RIDE C   (   4,X'S) H   (  41,X'S) 
RIDE C   (   6,X'S) H   (  61,X'S) 
RIDE C   (  13,X'S) H   ( 131,X'S) H   ( 132,X'S) H   ( 133,X'S) 
RIDE C   ( 113,X'S) H   (1131,X'S) H   (1132,X'S) H   (1133,X'S) 
RIDE C   (  14,X'S) H   ( 141,X'S) H   ( 142,X'S) H   ( 143,X'S) 
RIDE C   (  15,X'S) H   ( 151,X'S) H   ( 152,X'S) 
RIDE C   (  16,X'S) H   ( 161,X'S) H   ( 162,X'S) 
RIDE C   (  19,X'S) H   ( 191,X'S) 
RIDE C   (  20,X'S) H   ( 201,X'S) 
RIDE C   (  22,X'S) H   ( 221,X'S) 
RIDE C   (  23,X'S) H   ( 231,X'S) 
RIDE C   (  25,X'S) H   ( 251,X'S) H   ( 252,X'S) 
RIDE C   (  26,X'S) H   ( 261,X'S) H   ( 262,X'S) 
RIDE C   (  28,X'S) H   ( 281,X'S) H   ( 282,X'S) 
RIDE C   (  29,X'S) H   ( 291,X'S) H   ( 292,X'S) 
RIDE C   (  31,X'S) H   ( 311,X'S) H   ( 312,X'S) 
RIDE C   (  32,X'S) H   ( 321,X'S) H   ( 322,X'S) 
RIDE C   (  35,X'S) H   ( 351,X'S) 
RIDE C   (  36,X'S) H   ( 361,X'S) 
RIDE C   (  38,X'S) H   ( 381,X'S) 
RIDE C   (  39,X'S) H   ( 391,X'S) 
RIDE C   (  41,X'S) H   ( 411,X'S) H   ( 412,X'S) 
RIDE C   (  42,X'S) H   ( 421,X'S) H   ( 422,X'S) 
RIDE C   (  49,X'S) H   ( 491,X'S) H   ( 492,X'S) H   ( 493,X'S) 
RIDE C   (  50,X'S) H   ( 501,X'S) H   ( 502,X'S) H   ( 503,X'S) 
RIDE C   ( 119,X'S) H   (1191,X'S) 
RIDE C   ( 120,X'S) H   (1201,X'S) 
RIDE C   ( 122,X'S) H   (1221,X'S) 
RIDE C   ( 123,X'S) H   (1231,X'S) 
RIDE C   ( 125,X'S) H   (1251,X'S) H   (1252,X'S) 
RIDE C   ( 126,X'S) H   (1261,X'S) H   (1262,X'S) 
RIDE C   ( 128,X'S) H   (1281,X'S) H   (1282,X'S) 
RIDE C   ( 129,X'S) H   (1291,X'S) H   (1292,X'S) 
RIDE C   ( 131,X'S) H   (1311,X'S) H   (1312,X'S) 
RIDE C   ( 132,X'S) H   (1321,X'S) H   (1322,X'S) 
RIDE C   ( 135,X'S) H   (1351,X'S) 
RIDE C   ( 136,X'S) H   (1361,X'S) 
RIDE C   ( 138,X'S) H   (1381,X'S) 
RIDE C   ( 139,X'S) H   (1391,X'S) 
RIDE C   ( 153,X'S) H   (1531,X'S) H   (1532,X'S) H   (1533,X'S) 
END                                                                             
#
# Punched on 05/12/16 at 15:20:43
#
#LIST     16                                                                    
REM 
REM HYDROQUINONE RING 
REM 
DIST 0, 0.01 = MEAN C(18) TO C(19) C(19) TO C(20) 
CONT C(20) TO C(21) C(21) TO C(22) C(22) TO C(23) 
CONT C(18) TO C(23) C(34) TO C(35) C(35) TO C(36) 
CONT C(36) TO C(37) C(37) TO C(38) C(38) TO C(39) 
CONT C(34) TO C(39) C(118) TO C(119) C(119) TO C(120) 
CONT C(120) TO C(121) C(121) TO C(122) C(122) TO C(123) 
CONT C(118) TO C(123) C(134) TO C(135) C(135) TO C(136) 
CONT C(136) TO C(137) C(137) TO C(138) C(138) TO C(139) 
CONT C(134) TO C(139) 
ANGLE 0, 0.1 = MEAN          C(18) TO C(19) TO C(20) 
CONT C(19) TO C(20) TO C(21) C(20) TO C(21) TO C(22) 
CONT C(21) TO C(22) TO C(23) C(22) TO C(23) TO C(18) 
CONT C(23) TO C(18) TO C(19) C(34) TO C(35) TO C(36) 
CONT C(35) TO C(36) TO C(37) C(36) TO C(37) TO C(38) 
CONT C(37) TO C(38) TO C(39) C(38) TO C(39) TO C(34) 
CONT C(39) TO C(34) TO C(35) C(118) TO C(119) TO C(120) 
CONT C(119) TO C(120) TO C(121) C(120) TO C(121) TO C(122) 
CONT C(121) TO C(122) TO C(123) C(122) TO C(123) TO C(118) 
CONT C(123) TO C(118) TO C(119) C(134) TO C(135) TO C(136) 
CONT C(135) TO C(136) TO C(137) C(136) TO C(137) TO C(138) 
CONT C(137) TO C(138) TO C(139) C(138) TO C(139) TO C(134) 
CONT C(139) TO C(134) TO C(135) 
PLANAR 0.01 C(18) C(19) C(20) C(21) C(22) C(23) 
PLANAR 0.01 C(34) C(35) C(36) C(37) C(38) C(39) 
PLANAR 0.01 C(118) C(119) C(120) C(121) C(122) C(123) 
PLANAR 0.01 C(134) C(135) C(136) C(137) C(138) C(139) 
REM 
REM POLYETHER CHAIN 
REM 
DIST 0, 0.01 = MEAN  C(25) TO C(26) C(28) TO C(29) 
CONT C(31) TO C(32) C(125) TO C(126) C(128) TO C(129) 
CONT C(131) TO C(132) 
DIST 0, 0.01 = MEAN C(21) TO O(24) O(24) TO C(25) 
CONT C(26) TO O(27) O(27) TO C(28) C(29) TO O(30) 
CONT O(30) TO C(31) C(32) TO O(33) O(33) TO C(34) 
CONT C(121) TO O(124) O(124) TO C(125) 
CONT C(126) TO O(127) O(127) TO C(128) C(129) TO O(130) 
CONT O(130) TO C(131) C(132) TO O(133) O(133) TO C(134) 
ANGLE 0, 1 = MEAN            C(21) TO O(24) TO C(25) 
CONT O(24) TO C(25) TO C(26) C(25) TO C(26) TO O(27) 
CONT C(26) TO O(27) TO C(28) O(27) TO C(28) TO C(29) 
CONT C(28) TO C(29) TO O(30) C(29) TO O(30) TO C(31) 
CONT O(30) TO C(31) TO C(32) C(31) TO C(32) TO O(33) 
CONT C(32) TO O(33) TO C(34) C(121) TO O(124) TO C(125) 
CONT O(124) TO C(125) TO C(126) C(125) TO C(126) TO O(127) 
CONT C(126) TO O(127) TO C(128) O(127) TO C(128) TO C(129) 
CONT C(128) TO C(129) TO O(130) C(129) TO O(130) TO C(131) 
CONT O(130) TO C(131) TO C(132) C(131) TO C(132) TO O(133) 
CONT C(132) TO O(133) TO C(134) 
REM 
REM SELENOTRIAZOLE 
REM 
DIST 0, 0.01 = MEAN 
CONT C(8) TO SE(12) C(47) TO SE(48) 
DIST 0, 0.01 = MEAN 
CONT SE(12) TO C(13) SE(12) TO C(113) SE(48) TO C(49) 
DIST 0, 0.01 = MEAN 
CONT N(9) TO N(10) N(10) TO N(11) 
CONT N(43) TO N(44) N(44) TO N(45) 
DIST 0, 0.01 = MEAN 
CONT C(8) TO N(9) C(47) TO N(43) 
DIST 0, 0.01 = MEAN 
CONT C(7) TO N(11) C(46) TO N(45) 
DIST 0, 0.01 = MEAN 
CONT C(7) TO C(8)  C(46) TO C(47) 
ANGLE 0, 1 = MEAN 
CONT C(8) TO  SE(12) TO C(13) 
CONT C(8) TO  SE(12) TO C(113) 
CONT C(47) TO SE(48) TO C(49) 
NONBOND 3.6, 1.0 = 
CONT C(15) TO C(113) 
CONT C(113) TO C(50,-1,1,2,1,2) 
REM   SHIFTLIMIT   START (DO NOT REMOVE THIS LINE) 
LIMIT      0.01000000 U[ISO] 
LIMIT      0.01000000 X 
LIMIT      0.01000000 Y 
LIMIT      0.01000000 Z 
LIMIT      0.01000000 U[11] 
LIMIT      0.01000000 U[22] 
LIMIT      0.01000000 U[33] 
LIMIT      0.01000000 U[12] 
LIMIT      0.01000000 U[13] 
LIMIT      0.01000000 U[23] 
LIMIT      0.01000000 OCC 
REM   SHIFTLIMIT   END (DO NOT REMOVE THIS LINE) 
REM   DELU   START (DO NOT REMOVE THIS LINE) 
VIBR .0, 0.00200 = C(1) TO C(2) 
VIBR .0, 0.00200 = C(1) TO C(6) 
VIBR .0, 0.00500 = C(6) TO C(2) 
VIBR .0, 0.00200 = C(2) TO C(3) 
VIBR .0, 0.00500 = C(3) TO C(1) 
VIBR .0, 0.00200 = C(3) TO C(4) 
VIBR .0, 0.00200 = C(3) TO C(7) 
VIBR .0, 0.00500 = C(4) TO C(2) 
VIBR .0, 0.00500 = C(7) TO C(2) 
VIBR .0, 0.00500 = C(7) TO C(4) 
VIBR .0, 0.00200 = C(4) TO C(5) 
VIBR .0, 0.00500 = C(5) TO C(3) 
VIBR .0, 0.00200 = C(5) TO C(6) 
VIBR .0, 0.00200 = C(5) TO C(46) 
VIBR .0, 0.00500 = C(6) TO C(4) 
VIBR .0, 0.00500 = C(46) TO C(4) 
VIBR .0, 0.00500 = C(46) TO C(6) 
VIBR .0, 0.00500 = C(5) TO C(1) 
VIBR .0, 0.00200 = C(7) TO C(8) 
VIBR .0, 0.00200 = C(7) TO N(11) 
VIBR .0, 0.00500 = C(8) TO C(3) 
VIBR .0, 0.00500 = N(11) TO C(3) 
VIBR .0, 0.00500 = N(11) TO C(8) 
VIBR .0, 0.00200 = C(8) TO N(9) 
VIBR .0, 0.00200 = C(8) TO SE(12) 
VIBR .0, 0.00500 = N(9) TO C(7) 
VIBR .0, 0.00500 = SE(12) TO C(7) 
VIBR .0, 0.00500 = SE(12) TO N(9) 
VIBR .0, 0.00200 = N(9) TO N(10) 
VIBR .0, 0.00200 = N(9) TO C(15) 
VIBR .0, 0.00500 = N(10) TO C(8) 
VIBR .0, 0.00500 = C(15) TO C(8) 
VIBR .0, 0.00500 = C(15) TO N(10) 
VIBR .0, 0.00200 = N(10) TO N(11) 
VIBR .0, 0.00500 = N(11) TO N(9) 
VIBR .0, 0.00200 = N(11) TO C(14) 
VIBR .0, 0.00500 = N(10) TO C(7) 
VIBR .0, 0.00500 = C(14) TO C(7) 
VIBR .0, 0.00500 = C(14) TO N(10) 
VIBR .0, 0.00200 = SE(12) TO C(13) 
VIBR .0, 0.00500 = C(13) TO C(8) 
VIBR .0, 0.00200 = SE(12) TO I(252) 
VIBR .0, 0.00200 = SE(12) TO C(113) 
VIBR .0, 0.00500 = I(252) TO C(8) 
VIBR .0, 0.00500 = C(113) TO C(8) 
VIBR .0, 0.00200 = C(15) TO C(16) 
VIBR .0, 0.00500 = C(16) TO N(9) 
VIBR .0, 0.00200 = C(16) TO O(17) 
VIBR .0, 0.00500 = O(17) TO C(15) 
VIBR .0, 0.00200 = O(17) TO C(18) 
VIBR .0, 0.00500 = C(18) TO C(16) 
VIBR .0, 0.00200 = O(17) TO C(118) 
VIBR .0, 0.00500 = C(118) TO C(16) 
VIBR .0, 0.00200 = C(18) TO C(19) 
VIBR .0, 0.00200 = C(18) TO C(23) 
VIBR .0, 0.00500 = C(19) TO O(17) 
VIBR .0, 0.00500 = C(23) TO O(17) 
VIBR .0, 0.00500 = C(23) TO C(19) 
VIBR .0, 0.00200 = C(19) TO C(20) 
VIBR .0, 0.00500 = C(20) TO C(18) 
VIBR .0, 0.00200 = C(20) TO C(21) 
VIBR .0, 0.00500 = C(21) TO C(19) 
VIBR .0, 0.00200 = C(21) TO C(22) 
VIBR .0, 0.00200 = C(21) TO O(24) 
VIBR .0, 0.00500 = C(22) TO C(20) 
VIBR .0, 0.00500 = O(24) TO C(20) 
VIBR .0, 0.00500 = O(24) TO C(22) 
VIBR .0, 0.00200 = C(22) TO C(23) 
VIBR .0, 0.00500 = C(23) TO C(21) 
VIBR .0, 0.00500 = C(18) TO C(22) 
VIBR .0, 0.00200 = O(24) TO C(25) 
VIBR .0, 0.00500 = C(25) TO C(21) 
VIBR .0, 0.00200 = C(25) TO C(26) 
VIBR .0, 0.00500 = C(26) TO O(24) 
VIBR .0, 0.00200 = C(26) TO O(27) 
VIBR .0, 0.00500 = O(27) TO C(25) 
VIBR .0, 0.00200 = O(27) TO C(28) 
VIBR .0, 0.00500 = C(28) TO C(26) 
VIBR .0, 0.00200 = C(28) TO C(29) 
VIBR .0, 0.00500 = C(29) TO O(27) 
VIBR .0, 0.00200 = C(29) TO O(30) 
VIBR .0, 0.00500 = O(30) TO C(28) 
VIBR .0, 0.00200 = O(30) TO C(31) 
VIBR .0, 0.00500 = C(31) TO C(29) 
VIBR .0, 0.00200 = C(31) TO C(32) 
VIBR .0, 0.00500 = C(32) TO O(30) 
VIBR .0, 0.00200 = C(32) TO O(33) 
VIBR .0, 0.00500 = O(33) TO C(31) 
VIBR .0, 0.00200 = O(33) TO C(34) 
VIBR .0, 0.00500 = C(34) TO C(32) 
VIBR .0, 0.00200 = C(34) TO C(35) 
VIBR .0, 0.00200 = C(34) TO C(39) 
VIBR .0, 0.00500 = C(35) TO O(33) 
VIBR .0, 0.00500 = C(39) TO O(33) 
VIBR .0, 0.00500 = C(39) TO C(35) 
VIBR .0, 0.00200 = C(35) TO C(36) 
VIBR .0, 0.00500 = C(36) TO C(34) 
VIBR .0, 0.00200 = C(36) TO C(37) 
VIBR .0, 0.00500 = C(37) TO C(35) 
VIBR .0, 0.00200 = C(37) TO C(38) 
VIBR .0, 0.00200 = C(37) TO O(40) 
VIBR .0, 0.00500 = C(38) TO C(36) 
VIBR .0, 0.00500 = O(40) TO C(36) 
VIBR .0, 0.00500 = O(40) TO C(38) 
VIBR .0, 0.00200 = C(38) TO C(39) 
VIBR .0, 0.00500 = C(39) TO C(37) 
VIBR .0, 0.00500 = C(34) TO C(38) 
VIBR .0, 0.00200 = O(40) TO C(41) 
VIBR .0, 0.00500 = C(41) TO C(37) 
VIBR .0, 0.00200 = O(40) TO C(41) 
VIBR .0, 0.00200 = O(40) TO C(137) 
VIBR .0, 0.00500 = C(137) TO C(41) 
VIBR .0, 0.00200 = C(41) TO C(42) 
VIBR .0, 0.00500 = C(42) TO O(40) 
VIBR .0, 0.00200 = C(42) TO N(43) 
VIBR .0, 0.00500 = N(43) TO C(41) 
VIBR .0, 0.00200 = N(43) TO N(44) 
VIBR .0, 0.00200 = N(43) TO C(47) 
VIBR .0, 0.00500 = N(44) TO C(42) 
VIBR .0, 0.00500 = C(47) TO C(42) 
VIBR .0, 0.00500 = C(47) TO N(44) 
VIBR .0, 0.00200 = N(44) TO N(45) 
VIBR .0, 0.00500 = N(45) TO N(43) 
VIBR .0, 0.00200 = N(45) TO C(46) 
VIBR .0, 0.00200 = N(45) TO C(50) 
VIBR .0, 0.00500 = C(46) TO N(44) 
VIBR .0, 0.00500 = C(50) TO N(44) 
VIBR .0, 0.00500 = C(50) TO C(46) 
VIBR .0, 0.00200 = C(46) TO C(47) 
VIBR .0, 0.00500 = N(45) TO C(5) 
VIBR .0, 0.00500 = C(47) TO C(5) 
VIBR .0, 0.00500 = C(47) TO N(45) 
VIBR .0, 0.00200 = C(47) TO SE(48) 
VIBR .0, 0.00500 = N(43) TO C(46) 
VIBR .0, 0.00500 = SE(48) TO C(46) 
VIBR .0, 0.00500 = SE(48) TO N(43) 
VIBR .0, 0.00200 = SE(48) TO C(49) 
VIBR .0, 0.00500 = C(49) TO C(47) 
VIBR .0, 0.00200 = C(118) TO C(119) 
VIBR .0, 0.00200 = C(118) TO C(123) 
VIBR .0, 0.00500 = C(119) TO O(17) 
VIBR .0, 0.00500 = C(123) TO O(17) 
VIBR .0, 0.00500 = C(123) TO C(119) 
VIBR .0, 0.00200 = C(119) TO C(120) 
VIBR .0, 0.00500 = C(120) TO C(118) 
VIBR .0, 0.00200 = C(120) TO C(121) 
VIBR .0, 0.00500 = C(121) TO C(119) 
VIBR .0, 0.00200 = C(121) TO C(122) 
VIBR .0, 0.00200 = C(121) TO O(124) 
VIBR .0, 0.00500 = C(122) TO C(120) 
VIBR .0, 0.00500 = O(124) TO C(120) 
VIBR .0, 0.00500 = O(124) TO C(122) 
VIBR .0, 0.00200 = C(122) TO C(123) 
VIBR .0, 0.00500 = C(123) TO C(121) 
VIBR .0, 0.00500 = C(122) TO C(118) 
VIBR .0, 0.00200 = O(124) TO C(125) 
VIBR .0, 0.00500 = C(125) TO C(121) 
VIBR .0, 0.00200 = C(125) TO C(126) 
VIBR .0, 0.00500 = C(126) TO O(124) 
VIBR .0, 0.00200 = C(126) TO O(127) 
VIBR .0, 0.00500 = O(127) TO C(125) 
VIBR .0, 0.00200 = O(127) TO C(128) 
VIBR .0, 0.00500 = C(128) TO C(126) 
VIBR .0, 0.00200 = C(128) TO C(129) 
VIBR .0, 0.00500 = C(129) TO O(127) 
VIBR .0, 0.00200 = C(129) TO O(130) 
VIBR .0, 0.00500 = O(130) TO C(128) 
VIBR .0, 0.00200 = O(130) TO C(131) 
VIBR .0, 0.00500 = C(131) TO C(129) 
VIBR .0, 0.00200 = C(131) TO C(132) 
VIBR .0, 0.00500 = C(132) TO O(130) 
VIBR .0, 0.00200 = C(132) TO O(133) 
VIBR .0, 0.00500 = O(133) TO C(131) 
VIBR .0, 0.00200 = O(133) TO C(134) 
VIBR .0, 0.00500 = C(134) TO C(132) 
VIBR .0, 0.00200 = C(134) TO C(135) 
VIBR .0, 0.00200 = C(134) TO C(139) 
VIBR .0, 0.00500 = C(135) TO O(133) 
VIBR .0, 0.00500 = C(139) TO O(133) 
VIBR .0, 0.00500 = C(139) TO C(135) 
VIBR .0, 0.00200 = C(135) TO C(136) 
VIBR .0, 0.00500 = C(136) TO C(134) 
VIBR .0, 0.00200 = C(136) TO C(137) 
VIBR .0, 0.00500 = C(137) TO C(135) 
VIBR .0, 0.00200 = C(137) TO C(138) 
VIBR .0, 0.00500 = O(40) TO C(136) 
VIBR .0, 0.00500 = C(138) TO C(136) 
VIBR .0, 0.00500 = C(138) TO O(40) 
VIBR .0, 0.00200 = C(138) TO C(139) 
VIBR .0, 0.00500 = C(139) TO C(137) 
VIBR .0, 0.00500 = C(138) TO C(134) 
VIBR .0, 0.00200 = C(153) TO C(154) 
VIBR .0, 0.00200 = C(154) TO N(155) 
VIBR .0, 0.00500 = N(155) TO C(153) 
REM   DELU   END (DO NOT REMOVE THIS LINE) 
REM   THERMSIM   START (DO NOT REMOVE THIS LINE) 
U(IJ) .0, 0.04000 = C(1) TO C(2) 
U(IJ) .0, 0.04000 = C(1) TO C(6) 
U(IJ) .0, 0.04000 = C(2) TO C(3) 
U(IJ) .0, 0.04000 = C(3) TO C(4) 
U(IJ) .0, 0.04000 = C(3) TO C(7) 
U(IJ) .0, 0.04000 = C(4) TO C(5) 
U(IJ) .0, 0.04000 = C(5) TO C(6) 
U(IJ) .0, 0.04000 = C(5) TO C(46) 
U(IJ) .0, 0.04000 = C(7) TO C(8) 
U(IJ) .0, 0.04000 = C(7) TO N(11) 
U(IJ) .0, 0.04000 = C(8) TO N(9) 
U(IJ) .0, 0.04000 = C(8) TO SE(12) 
U(IJ) .0, 0.04000 = N(9) TO N(10) 
U(IJ) .0, 0.04000 = N(9) TO C(15) 
U(IJ) .0, 0.04000 = N(10) TO N(11) 
U(IJ) .0, 0.08000 = N(11) TO C(14) 
U(IJ) .0, 0.08000 = SE(12) TO C(13) 
U(IJ) .0, 0.08000 = SE(12) TO I(252) 
U(IJ) .0, 0.08000 = SE(12) TO C(113) 
U(IJ) .0, 0.04000 = C(15) TO C(16) 
U(IJ) .0, 0.04000 = C(16) TO O(17) 
U(IJ) .0, 0.04000 = O(17) TO C(18) 
U(IJ) .0, 0.04000 = O(17) TO C(118) 
U(IJ) .0, 0.04000 = C(18) TO C(19) 
U(IJ) .0, 0.04000 = C(18) TO C(23) 
U(IJ) .0, 0.04000 = C(19) TO C(20) 
U(IJ) .0, 0.04000 = C(20) TO C(21) 
U(IJ) .0, 0.04000 = C(21) TO C(22) 
U(IJ) .0, 0.04000 = C(21) TO O(24) 
U(IJ) .0, 0.04000 = C(22) TO C(23) 
U(IJ) .0, 0.04000 = O(24) TO C(25) 
U(IJ) .0, 0.04000 = C(25) TO C(26) 
U(IJ) .0, 0.04000 = C(26) TO O(27) 
U(IJ) .0, 0.04000 = O(27) TO C(28) 
U(IJ) .0, 0.04000 = C(28) TO C(29) 
U(IJ) .0, 0.04000 = C(29) TO O(30) 
U(IJ) .0, 0.04000 = O(30) TO C(31) 
U(IJ) .0, 0.04000 = C(31) TO C(32) 
U(IJ) .0, 0.04000 = C(32) TO O(33) 
U(IJ) .0, 0.04000 = O(33) TO C(34) 
U(IJ) .0, 0.04000 = C(34) TO C(35) 
U(IJ) .0, 0.04000 = C(34) TO C(39) 
U(IJ) .0, 0.04000 = C(35) TO C(36) 
U(IJ) .0, 0.04000 = C(36) TO C(37) 
U(IJ) .0, 0.04000 = C(37) TO C(38) 
U(IJ) .0, 0.04000 = C(37) TO O(40) 
U(IJ) .0, 0.04000 = C(38) TO C(39) 
U(IJ) .0, 0.04000 = O(40) TO C(41) 
U(IJ) .0, 0.04000 = O(40) TO C(41) 
U(IJ) .0, 0.04000 = O(40) TO C(137) 
U(IJ) .0, 0.04000 = C(41) TO C(42) 
U(IJ) .0, 0.04000 = C(42) TO N(43) 
U(IJ) .0, 0.04000 = N(43) TO N(44) 
U(IJ) .0, 0.04000 = N(43) TO C(47) 
U(IJ) .0, 0.04000 = N(44) TO N(45) 
U(IJ) .0, 0.04000 = N(45) TO C(46) 
U(IJ) .0, 0.08000 = N(45) TO C(50) 
U(IJ) .0, 0.04000 = C(46) TO C(47) 
U(IJ) .0, 0.04000 = C(47) TO SE(48) 
U(IJ) .0, 0.08000 = SE(48) TO C(49) 
U(IJ) .0, 0.04000 = C(118) TO C(119) 
U(IJ) .0, 0.04000 = C(118) TO C(123) 
U(IJ) .0, 0.04000 = C(119) TO C(120) 
U(IJ) .0, 0.04000 = C(120) TO C(121) 
U(IJ) .0, 0.04000 = C(121) TO C(122) 
U(IJ) .0, 0.04000 = C(121) TO O(124) 
U(IJ) .0, 0.04000 = C(122) TO C(123) 
U(IJ) .0, 0.04000 = O(124) TO C(125) 
U(IJ) .0, 0.04000 = C(125) TO C(126) 
U(IJ) .0, 0.04000 = C(126) TO O(127) 
U(IJ) .0, 0.04000 = O(127) TO C(128) 
U(IJ) .0, 0.04000 = C(128) TO C(129) 
U(IJ) .0, 0.04000 = C(129) TO O(130) 
U(IJ) .0, 0.04000 = O(130) TO C(131) 
U(IJ) .0, 0.04000 = C(131) TO C(132) 
U(IJ) .0, 0.04000 = C(132) TO O(133) 
U(IJ) .0, 0.04000 = O(133) TO C(134) 
U(IJ) .0, 0.04000 = C(134) TO C(135) 
U(IJ) .0, 0.04000 = C(134) TO C(139) 
U(IJ) .0, 0.04000 = C(135) TO C(136) 
U(IJ) .0, 0.04000 = C(136) TO C(137) 
U(IJ) .0, 0.04000 = C(137) TO C(138) 
U(IJ) .0, 0.04000 = C(138) TO C(139) 
U(IJ) .0, 0.08000 = C(153) TO C(154) 
U(IJ) .0, 0.08000 = C(154) TO N(155) 
REM   THERMSIM   END (DO NOT REMOVE THIS LINE) 
RESTRAIN 1,0.00001 = I(52,OCC) + I(152,OCC) + I(252,OCC) 
REM   HREST   START (DO NOT REMOVE THIS LINE) 
REM   HREST   END (DO NOT REMOVE THIS LINE) 
END                                                                             
;

# Manually omitted reflections

loop_
_oxford_refln_omitted_index_h
_oxford_refln_omitted_index_k
_oxford_refln_omitted_index_l
_oxford_refln_omitted_flag
_oxford_refln_omitted_details
   0   4   2  x   .
   6   0   0  x   .
  -8   0   2  x   .
   3  29   1  x   .
   2   6   0  x   .
   3   2   2  x   .
  -3   3   1  x   .
   2   4   0  x   .


#==============================================================================
# start Validation Reply Form
#==============================================================================
_vrf_PLAT026_10-Se-I 
;
PROBLEM: Ratio Observed / Unique Reflections (too) Low ..         29 %     
RESPONSE: The crystals were both small and weakly diffracting, presumably
due to the disorder in the macrocycle and generally poor ordering in the 
structure.  Despite several attempts to collect data, these were the best
possible as longer exposures caused radition damage.
;
#==============================================================================
# end Validation Reply Form
#==============================================================================
